# Supplementary material for: NO 2 concentration differences under clear versus cloudy skies and implications for applications of satellite measurements
Source: Copernicus journal article supplement (doi:10.5194/egusphere-2025-1350), 2025-04-15
Supplement: Supplementary file 1 [file egusphere-2025-1350-supplement.pdf]

## Supporting Information for

### NO<sub>2</sub> concentration differences under clear versus cloudy skies and implications for applications of satellite measurements

Daniel L. Goldberg<sup>\*,1</sup>, M. Omar Nawaz<sup>1</sup>, Congmeng Lyu<sup>2,3</sup>, Jian He<sup>2,3</sup>, Annmarie G. Carlton<sup>4</sup>, Shobha Kondragunta<sup>5</sup>, Susan C. Anenberg<sup>1</sup>

<sup>1</sup>Department of Environmental and Occupational Health, Milken Institute of Public Health, George Washington University, Washington, DC, USA

<sup>2</sup>Cooperative Institute for Research in Environmental Sciences, University of Colorado, Boulder, CO, USA

<sup>3</sup>NOAA Chemical Sciences Laboratory, Boulder, CO, USA

<sup>4</sup>Department of Chemistry, University of California - Irvine, Irvine, CA, USA

<sup>5</sup>NOAA NESDIS Center for Satellite Applications and Research, College Park, MD, USA

*\*Correspondence to:* Daniel L. Goldberg ([dgoldberg@gwu.edu](mailto:dgoldberg@gwu.edu))

#### Contents of this file

**Figure S1.** Percentage of days over the contiguous U.S. during 2019 with cloud fractions less than 0.3 as simulated by WRF-Chem at various local times.

**Figure S2.** Scatterplots of various 2019 annual averages of surface NO<sub>2</sub> and the 2019 annual TROPOMI NO<sub>2</sub> 13:30 measurements during clear skies (qa\_value >0.75).

**Figure S3.** Annualized surface jNO<sub>2</sub> from WRF-Chem. Ratio of the annualized surface jNO<sub>2</sub> from WRF-Chem during no cloud and cloudy days, with measurements of the ratio of surface UV-B radiation during no cloud and cloudy days overlaid. Measurements of UV-B radiation from the 7 NOAA SURFRAD Network (<https://gml.noaa.gov/grad/surfrad/sitepage.html>) during cloudy and no cloud days as quantified by TROPOMI.

**Table S1.** Slope, r<sup>2</sup>, Normalized Mean Change (NMC), and number of sites of the “cloudy vs. all days” bias.

**Table S2.** Slope, r<sup>2</sup>, Normalized Mean Change (NMC), and number of sites of the “all days vs. no clouds” bias.

31

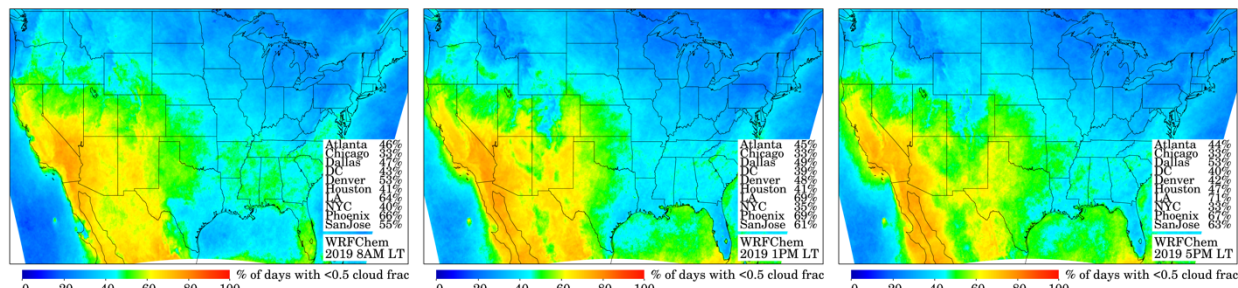

32  
33 **Figure S1.** Percentage of days over the contiguous U.S. during 2019 with cloud fractions less than 0.3 as simulated  
34 by WRF-Chem at various local times: (Left) 8:30, (Center) 13:30, (Right) 17:30.  
35  
36

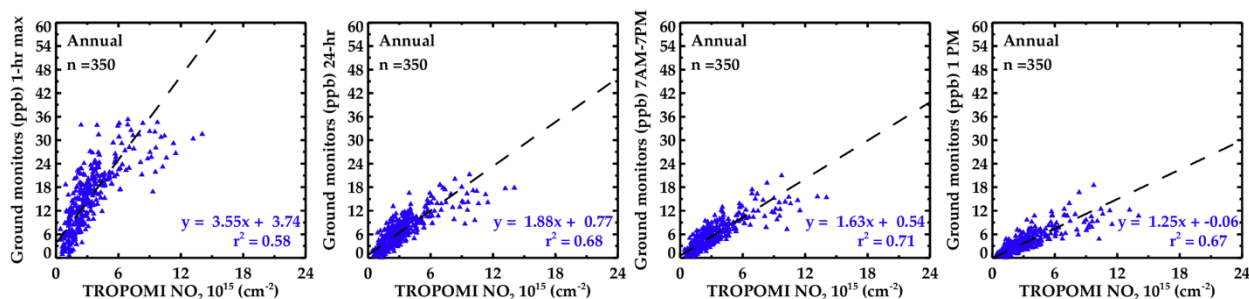

37  
38 **Figure S2.** Scatterplots of various 2019 annual averages of surface NO<sub>2</sub> and the 2019 annual TROPOMI NO<sub>2</sub> 13:30  
39 measurements during clear skies (qa\_value > 0.75).  
40

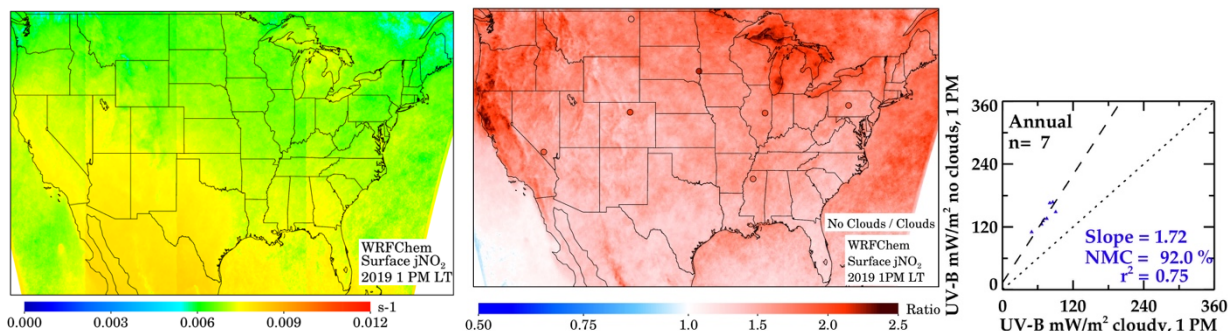

41  
42 **Figure S3.** (Left) annualized surface jNO<sub>2</sub> from WRF-Chem. (Center) Ratio of the annualized surface jNO<sub>2</sub> from  
43 WRF-Chem during no cloud and cloudy days, with measurements of the ratio of surface UV-B radiation during no  
44 cloud and cloudy days overlaid. (Right) Measurements of UV-B radiation from the 7 NOAA SURFRAD Network  
45 (<https://gml.noaa.gov/grad/surfrad/sitepage.html>) during cloudy and no cloud days as quantified by TROPOMI.  
46

**Table S1.** Slope,  $r^2$ , Normalized Mean Change (NMC), and number of sites of the “cloudy vs. all days” bias by further filtering out AQS data using various additional sensitivity analyses.

|                          | Slope | $r^2$ | NMC   |
|--------------------------|-------|-------|-------|
| Baseline (V2.4)          | 1.11  | 0.96  | 12.9% |
| V2.3.1                   | 1.08  | 0.96  | 11.8% |
| V2.4 higher cloud filter | 1.18  | 0.92  | 28.6% |
| V2.4 all sites           | 1.03  | 0.96  | 11.8% |
| V2.4 near road           | 0.95  | 0.93  | 6.1%  |
| V2.4 no chemi            | 1.12  | 0.95  | 19.6% |
| V2.4 Summer              | 1.09  | 0.94  | 10.5% |
| V2.4 Winter              | 1.08  | 0.96  | 9.6%  |
| V2.4 Spring              | 1.12  | 0.98  | 8.4%  |
| V2.4 Fall                | 1.04  | 0.88  | 12.6% |
| V2.4 North               | 1.14  | 0.98  | 13.9% |
| V2.4 South               | 1.01  | 0.89  | 11.6% |
| V2.4 NorthEast           | 1.16  | 0.99  | 17.5% |
| V2.4 SouthEast           | 1.12  | 0.98  | 14.6% |
| V2.4 NorthWest           | 1.09  | 0.97  | 10.5% |
| V2.4 SouthWest           | 0.96  | 0.86  | 8.9%  |
| V2.4 lowPopDensity       | 1.18  | 0.96  | 11.1% |
| V2.4 highPopDensity      | 1.08  | 0.93  | 15.5% |
| V2.4 lowRoadDensity      | 1.13  | 0.95  | 10.9% |
| V2.4 highRoadDensity     | 1.09  | 0.94  | 15.7% |

**Table S2.** Slope,  $r^2$ , Normalized Mean Change (NMC), and number of sites of the “all days vs. no clouds” bias by further filtering out AQS data using various additional sensitivity analyses.

|                          | Slope | $r^2$ | NMC   |
|--------------------------|-------|-------|-------|
| Baseline (V2.4)          | 1.09  | 0.95  | 17.2% |
| V2.3.1                   | 1.10  | 0.95  | 21.3% |
| V2.4 higher cloud filter | 1.06  | 0.97  | 32.1% |
| V2.4 all sites           | 1.02  | 0.97  | 15.7% |
| V2.4 near road           | 0.93  | 0.98  | 8.4%  |
| V2.4 no chemi            | 1.07  | 0.95  | 26.5% |
| V2.4 Summer              | 1.07  | 0.98  | 23.8% |
| V2.4 Winter              | 1.07  | 0.94  | 14.7% |
| V2.4 Spring              | 1.15  | 0.96  | 17.4% |
| V2.4 Fall                | 1.03  | 0.97  | 13.7% |
| V2.4 North               | 1.15  | 0.95  | 22.3% |
| V2.4 South               | 0.97  | 0.98  | 10.1% |
| V2.4 NorthEast           | 1.18  | 0.97  | 36.2% |
| V2.4 SouthEast           | 1.13  | 0.98  | 16.1% |
| V2.4 NorthWest           | 1.03  | 0.96  | 9.1%  |
| V2.4 SouthWest           | 0.95  | 0.99  | 4.8%  |
| V2.4 lowPopDensity       | 1.15  | 0.94  | 17.9% |
| V2.4 highPopDensity      | 1.05  | 0.92  | 17.3% |
| V2.4 lowRoadDensity      | 1.04  | 0.93  | 16.0% |
| V2.4 highRoadDensity     | 1.08  | 0.94  | 19.8% |
